# Supplementary material for: Free and Added Sugar Consumption and Adherence to Guidelines: The UK National Diet and Nutrition Survey (2014/15–2015/16)
Source: PubMed Central journal article supplement (PMC7071218; doi:10.3390/nu12020393), 2020-02-01
Supplement: nutrients-12-00393-s001.pdf [file nutrients-12-00393-s001.pdf]

**Table S1.** Daily intakes of added and free sugars by age and sex\* (NDNS 2014-2016) (Including consumers and non-consumers).

| Added and free sugars combinations |                | Children, 1.5-3 Years |                  | Adults, 65+ Years |                  |
|------------------------------------|----------------|-----------------------|------------------|-------------------|------------------|
|                                    |                | Combined (n=250)      | Male (n=141)     | Female (n=194)    | Combined (n=335) |
| Added sugars (EFSA) <sup>1</sup>   | g/day, Median  | 20.4                  | 39.9             | 30.5              | 34.0             |
|                                    | g/day, P25-P75 | 12.3-31.5             | 21.7-68.0        | 17.3-43.0         | 20.2-51.5        |
|                                    | %TE, Median    | 7 <sup>a,b</sup>      | 8 <sup>a,b</sup> | 8 <sup>a,b</sup>  | 8 <sup>a,b</sup> |
|                                    | %TE, P25-P75   | 5-11                  | 5-13             | 5-11              | 5-12             |
| Free sugars (WHO) <sup>2</sup>     | g/day, Median  | 27.0                  | 50.4             | 34.4              | 40.6             |
|                                    | g/day, P25-P75 | 18.1-40.4             | 31.3-80.6        | 22.4-47.3         | 25.4-61.9        |
|                                    | %TE, Median    | 9                     | 11               | 9                 | 10               |
|                                    | %TE, P25-P75   | 6-14                  | 7-16             | 6-13              | 6-14             |
| Free sugars (SACN) <sup>3</sup>    | g/day, Median  | 28.9                  | 51.1             | 34.9              | 41.7             |
|                                    | g/day, P25-P75 | 18.5-42.4             | 31.5-81.1        | 22.5-47.7         | 25.5-62.2        |
|                                    | %TE, Median    | 10                    | 11               | 9                 | 10               |
|                                    | %TE, P25-P75   | 7-15                  | 7-16             | 16-13             | 6-14             |

NDNS: UK National Diet and Nutrition Survey. n= number of participants. <sup>1</sup>Added sugars (European Food Safety Authority, EFSA): Sugar—table + Sugar—other; <sup>2</sup>Free sugars (World Health Organisation, WHO): Added sugars (EFSA) + Sugar—honey + Sugar—fruit juice; <sup>3</sup>Free sugars (UK Scientific Advisory Committee on Nutrition, SACN): Free sugars (WHO) + Sugar—pureed fruit; P25-P75: Inter-Quartile Range (percentile 25<sup>th</sup>–75<sup>th</sup>). <sup>a</sup>Significant difference between free sugars (WHO) and added sugars (EFSA) ( $p < 0.05$ ). <sup>b</sup>Significant difference between free sugars (SACN) and added sugars (EFSA) ( $p < 0.05$ ). <sup>c</sup>Significant difference between % Total Energy (TE) of adults and children ( $p < 0.05$ ). <sup>d</sup>Significant difference between % TE of adults and teenagers ( $p < 0.05$ ).

**Table S2.** Daily intakes of individual sugar components by age and sex\* (NDNS 2014-2016)  
(Including consumers and non-consumers)

| Individual sugar components       |                | Children, 1.5-3 Years |              | Adults, 65+ Years |                  |
|-----------------------------------|----------------|-----------------------|--------------|-------------------|------------------|
|                                   |                | Combined (n=250)      | Male (n=141) | Female (n=194)    | Combined (n=335) |
| Sugar – table <sup>1</sup>        | g/day, Median  | 16.6                  | 34.4         | 25.2              | 28.4             |
|                                   | g/day, P25-P75 | 10.4-25.3             | 18.6-52.8    | 15.9-36.7         | 17.1-45.1        |
|                                   | %TE, Median    | 6                     | 7            | 6                 | 7                |
|                                   | %TE, P25-P75   | 4-9                   | 4-11         | 4-11              | 4-11             |
| Sugar – other <sup>2</sup>        | g/day, Median  | 3.0                   | 4.5          | 3.6               | 4.2              |
|                                   | g/day, P25-P75 | 1.0-5.6               | 2.0-7.2      | 1.3-5.9           | 1.6-6.6          |
|                                   | %TE, Median    | 1                     | 1            | 1                 | 1                |
|                                   | %TE, P25-P75   | 0-2                   | 0-1          | 0-1               | 0-1              |
| Sugar – honey <sup>3</sup>        | g/day, Median  | 0.0                   | 0.0          | 0.0               | 0.0              |
|                                   | g/day, P25-P75 | 0.0-0.0               | 0.0-0.1      | 0.0-0.2           | 0.0-0.2          |
|                                   | %TE, Median    | 0                     | 0            | 0                 | 0                |
|                                   | %TE, P25-P75   | 0-0                   | 0-0          | 0-0               | 0-0              |
| Sugar - fruit juice <sup>4</sup>  | g/day, Median  | 2.2                   | 5.3          | 0.4               | 1.2              |
|                                   | g/day, P25-P75 | 0.5-7.9               | 0.7-15.5     | 0.0-3.2           | 0.1-10.6         |
|                                   | %TE, Median    | 1                     | 1            | 0                 | 0                |
|                                   | %TE, P25-P75   | 0-3                   | 0-3          | 0-1               | 0-2              |
| Sugar - pureed fruit <sup>5</sup> | g/day, Median  | 0.3                   | 0.3          | 0.2               | 0.3              |
|                                   | g/day, P25-P75 | 0.1-0.9               | 0.0-0.7      | 0.0-0.6           | 0.0-0.7          |
|                                   | %TE, Median    | 0                     | 0            | 0                 | 0                |
|                                   | %TE, P25-P75   | 0-0                   | 0-0          | 0-0               | 0-0              |
| Sugar - stewed fruit <sup>6</sup> | g/day, Median  | 0.0                   | 0.0          | 0.0               | 0.0              |
|                                   | g/day, P25-P75 | 0.0-0.0               | 0.0-0.7      | 0.0-0.2           | 0.0-0.4          |
|                                   | %TE, Median    | 0                     | 0            | 0                 | 0                |
|                                   | %TE, P25-P75   | 0-0                   | 0-0          | 0-0               | 0-0              |
| Sugar - dried fruit <sup>7</sup>  | g/day, Median  | 0.7                   | 1.3          | 1.0               | 1.3              |
|                                   | g/day, P25-P75 | 0.0-4.5               | 0.0-5.7      | 0.0-3.8           | 0.0-4.5          |
|                                   | %TE, Median    | 0                     | 0            | 0                 | 0                |
|                                   | %TE, P25-P75   | 0-1                   | 0-1          | 0-1               | 0-1              |

NDNS: UK National Diet and Nutrition Survey. n= number of participants. <sup>1</sup>Sugar—table: Including all sucrose sugars such as granulated sugar used in baking/confectionary and cakes, etc.; <sup>2</sup>Sugar—other: Sugar in other sugar-based sweeteners such as glucose syrup; <sup>3</sup>Sugar—honey: Sugar in honey; <sup>4</sup>Sugar—fruit juice: Sugar in fruit and vegetable juice; <sup>5</sup>Sugar—pureed fruit: Sugar in fruit puree; <sup>6</sup>Sugar—stewed fruit: Sugar in stewed fruit; <sup>7</sup>Sugar—dried fruit: Sugar in dried fruit; % TE: total energy. P25–P75: Inter-Quartile Range (percentile 25<sup>th</sup>–75<sup>th</sup>).

**Table S3.** Daily intakes of individual sugar components by age and sex\*  
(NDNS 2014-2016) (Consumers only)

| Individual sugar components       |                                       | Children, 1.5-3 Years |           | Adults, 65+ Years |           |
|-----------------------------------|---------------------------------------|-----------------------|-----------|-------------------|-----------|
|                                   |                                       | Combine<br>d          | Male      | Female            | Combined  |
| Sugar – table <sup>1</sup>        | % Consumers                           | 100                   | 100       | 100               | 100       |
|                                   | g/day, Median                         | 16.6                  | 34.4      | 25.2              | 28.4      |
|                                   | g/day, P25-P75                        | 10.4-25.3             | 18.6-52.8 | 15.9-36.7         | 17.1-45.1 |
|                                   | %TE, Median                           | 6                     | 7         | 6                 | 7         |
|                                   | %TE, P25-P75                          | 4-9                   | 4-11      | 4-11              | 4-11      |
| Sugar – other <sup>2</sup>        | % Consumers                           | 99                    | 98        | 98                | 98        |
|                                   | g/day, Median                         | 3.0                   | 4.6       | 3.6               | 4.2       |
|                                   | g/day, P25-P75                        | 1.0-5.6               | 2.0-7.2   | 1.5-5.9           | 1.7-6.7   |
|                                   | %TE, Median                           | 1                     | 1         | 1                 | 1         |
|                                   | %TE, P25-P75                          | 0-2                   | 0-1       | 0-1               | 0-1       |
| Sugar – honey <sup>3</sup>        | % Consumers                           | 24                    | 26        | 25                | 26        |
|                                   | g/day, Median                         | 1.0                   | 4.0       | 1.6               | 1.8       |
|                                   | g/day, P25-P75                        | 0.1-3.2               | 0.2-6.4   | 0.4-5.3           | 0.3-5.6   |
|                                   | %TE, Median                           | 0                     | 1         | 0                 | 0         |
|                                   | %TE, P25-P75                          | 0-1                   | 0-1       | 0-1               | 0-1       |
| Sugar - fruit juice <sup>4</sup>  | % Consumers                           | 94                    | 90        | 84                | 87        |
|                                   | g/day, Median                         | 3.0                   | 7.7       | 1.0               | 2.6       |
|                                   | g/day, P25-P75                        | 0.7-8.6               | 1.0-16.4  | 0.2-3.7           | 0.3-12.2  |
|                                   | %TE, Median                           | 1                     | 2         | 0                 | 1         |
|                                   | %TE, P25-P75                          | 0-3                   | 0-3       | 0-1               | 0-2       |
| Sugar - pureed fruit <sup>5</sup> | % Consumers                           | 92                    | 74        | 75                | 74        |
|                                   | g/day, Median                         | 0.4                   | 0.5       | 0.4               | 0.4       |
|                                   | g/day, P25-P75                        | 0.2-1.0               | 0.3-0.9   | 0.2-0.7           | 0.2-0.8   |
|                                   | %TE, Median                           | 0                     | 0         | 0                 | 0         |
|                                   | %TE, P25-P75                          | 0-0                   | 0-0       | 0-0               | 0-0       |
| Sugar - stewed fruit <sup>6</sup> | % Consumers                           | 22                    | 48        | 44                | 46        |
|                                   | g/day, Median                         | 0.2                   | 0.6       | 0.4               | 0.5       |
|                                   | g/day, P25-P75                        | 0.1-0.8               | 0.1-3.3   | 0.1-1.6           | 0.1-2.8   |
|                                   | %TE, Median                           | 0                     | 0         | 0                 | 0         |
|                                   | %TE, P25-P75                          | 0-0                   | 0-1       | 0-0               | 0-1       |
| Sugar - dried fruit <sup>7</sup>  | % Consumers                           | 55                    | 57        | 61                | 59        |
|                                   | g/day, Median                         | 3.8                   | 5.0       | 3.2               | 3.8       |
|                                   | g/day, P25-P75                        | 0.1-17.9              | 0.4-34.7  | 0.2-18.4          | 0.2-24.9  |
|                                   | %TE, Median                           | 1                     | 1         | 1                 | 1         |
|                                   | %TE, P25-P75                          | 0-6                   | 0-9       | 0-4               | 0-5       |
| Bases (unweighted)                | n, consumers<br>and non-<br>consumers | 250                   | 141       | 194               | 335       |

NDNS: UK National Diet and Nutrition Survey. <sup>1</sup>Sugar – table: Including all sucrose sugars such as granulated sugar used in baking/ confectionary and cakes, etc.; <sup>2</sup>Sugar – other: Sugar in other sugar-based sweeteners such as glucose syrup; <sup>3</sup>Sugar – honey: Sugar in honey; <sup>4</sup>Sugar – fruit juice: Sugar in fruit and vegetable juice; <sup>5</sup>Sugar – pureed fruit: Sugar in fruit puree; <sup>6</sup>Sugar – stewed fruit: Sugar in stewed fruit; <sup>7</sup>Sugar – dried fruit: Sugar in dried fruit; % TE: total energy. % Consumers: Percentage of consumers of this type of sugar; P25-P75: Inter-Quartile Range (percentile 25<sup>th</sup>- 75<sup>th</sup>). n= number of participants.

**Table S4.** Percentage meeting recommendations for free sugars intake by age groups and sex\* (NDNS 2014-2016) (Including consumers and non-consumers)

| Added and free sugars combinations |                      | %                     |                 |                   |                      |
|------------------------------------|----------------------|-----------------------|-----------------|-------------------|----------------------|
|                                    |                      | Children, 1.5-3 Years |                 | Adults, 65+ Years |                      |
|                                    |                      | Combine d<br>(n=250)  | Male<br>(n=141) | Female<br>(n=194) | Combine d<br>(n=335) |
| Added sugars (EFSA) <sup>1</sup>   | <5 %TE <sup>4</sup>  | 27                    | 27              | 23                | 25                   |
|                                    | <10 %TE <sup>5</sup> | 70                    | 61              | 66                | 64                   |
| Free sugars (WHO) <sup>2</sup>     | <5 %TE <sup>4</sup>  | 15                    | 11              | 18                | 15                   |
|                                    | <10 %TE <sup>5</sup> | 53                    | 43              | 59                | 52                   |
| Free sugars (SACN) <sup>3</sup>    | <5 %TE <sup>4</sup>  | 14                    | 9               | 17                | 13                   |
|                                    | <10 %TE <sup>5</sup> | 49                    | 42              | 58                | 51                   |

NDNS: UK National Diet and Nutrition Survey. n= number of participants. <sup>1</sup>Added sugars (European Food Safety Authority, EFSA): Sugar—table + Sugar—other; <sup>2</sup>Free sugars (World Health Organisation, WHO): Added sugars (EFSA) + Sugar—honey + Sugar—fruit juice; <sup>3</sup>Free sugars (UK Scientific Advisory Committee on Nutrition, SACN): Free sugars (WHO) + Sugar—pureed fruit. <sup>4</sup>Recommendation by the SACN (<5% TE: Below 5% of total energy); <sup>5</sup>Recommendation by the WHO (<10% TE: Below 10% of total energy).

**Table S5.** Contribution (%) of NDNS RP food group sources to intake of sugars by age (1.5-3 Years) (NDNS 2014-2016)\*

| Children, 1.5-3 Years (N=250)                       |                                  |                                |                                 |               |                     |                      |                      |                     |
|-----------------------------------------------------|----------------------------------|--------------------------------|---------------------------------|---------------|---------------------|----------------------|----------------------|---------------------|
|                                                     | Added sugars (EFSA) <sup>1</sup> | Free sugars (WHO) <sup>2</sup> | Free sugars (SACN) <sup>3</sup> | Sugar - honey | Sugar - fruit juice | Sugar - pureed fruit | Sugar - stewed fruit | Sugar - dried fruit |
| Cereals and cereal products                         | 38.8                             | 31.8                           | 30.5                            | 11.8          | 1.8                 | 3.8                  | 9.6                  | 19.9                |
| - Breakfast cereals                                 | 9.2                              | 7.7                            | 7.2                             | 8.3           | 0.0                 | 0.0                  | 0.0                  | 5.9                 |
| - Biscuits, buns, cakes, pastries, fruit pies       | 25.5                             | 20.8                           | 20.2                            | 3.5           | 1.4                 | 3.6                  | 9.6                  | 13.6                |
| - Pasta, rice, bread and other cereals              | 4.1                              | 3.3                            | 3.1                             | 0.1           | 0.4                 | 0.3                  | 0.0                  | 0.4                 |
| Sugars, preserves, confectionery                    | 21.5                             | 20.5                           | 20.3                            | 12.5          | 7.2                 | 13.3                 | 0.0                  | 3.5                 |
| - Sugars <sup>4</sup> , preserves, sweet spreads    | 6.9                              | 7.6                            | 7.5                             | 12.5          | 0.2                 | 11.0                 | 0.0                  | 0.0                 |
| - Sugars consumed in tea and coffee                 | 1.5                              | 1.4                            | 1.4                             | 0.0           | 0.0                 | 0.0                  | 0.0                  | 0.0                 |
| - Sugar confectionery                               | 5.4                              | 5.1                            | 5.3                             | 0.0           | 7.0                 | 2.3                  | 0.0                  | 3.4                 |
| - Chocolate confectionery                           | 7.7                              | 6.3                            | 6.2                             | 0.0           | 0.0                 | 0.0                  | 0.0                  | 0.2                 |
| Milk and milk products                              | 25.0                             | 20.3                           | 19.5                            | 1.9           | 2.5                 | 35.2                 | 1.4                  | 0.0                 |
| - Yogurt, fromage frais, dairy desserts             | 14.2                             | 11.8                           | 11.6                            | 1.9           | 0.8                 | 33.3                 | 1.4                  | 0.0                 |
| - Ice cream                                         | 5.0                              | 3.7                            | 3.6                             | 0.0           | 0.1                 | 1.7                  | 0.0                  | 0.0                 |
| - Cream and other milks <sup>5</sup>                | 5.8                              | 4.7                            | 4.3                             | 0.0           | 0.9                 | 0.3                  | 0.0                  | 0.0                 |
| Fruits and fruit products                           | 0.0                              | 0.0                            | 0.9                             | 0.0           | 0.1                 | 6.7                  | 5.0                  | 29.6                |
| Non-alcoholic beverages                             | 7.1                              | 20.7                           | 21.3                            | 0.0           | 76.5                | 23.7                 | 0.2                  | 0.0                 |
| - Fruit and vegetable juice                         | 0.2                              | 12.2                           | 12.4                            | 0.0           | 39.7                | 3.5                  | 0.0                  | 0.0                 |
| - Soft drinks <sup>6</sup> (not diet <sup>7</sup> ) | 6.9                              | 6.9                            | 6.8                             | 0.0           | 10.4                | 0.7                  | 0.2                  | 0.0                 |
| - Soft drinks <sup>6</sup> (diet <sup>7</sup> )     | 0.0                              | 1.5                            | 2.2                             | 0.0           | 26.4                | 19.4                 | 0.0                  | 0.0                 |
| Alcoholic beverages                                 | 0.0                              | 0.0                            | 0.0                             | 0.0           | 0.0                 | 0.0                  | 0.0                  | 0.0                 |
| Miscellaneous                                       | 3.7                              | 3.5                            | 4.2                             | 0.0           | 4.3                 | 4.9                  | 3.5                  | 1.4                 |
| - Beverages dry weight <sup>8</sup>                 | 1.7                              | 1.6                            | 1.5                             | 0.0           | 0.0                 | 0.0                  | 0.0                  | 0.0                 |
| - Soups                                             | 0.4                              | 0.3                            | 0.3                             | 0.0           | 0.0                 | 0.0                  | 0.0                  | 0.0                 |
| - Savoury sauces and condiments                     | 1.4                              | 1.1                            | 1.0                             | 0.0           | 2.0                 | 0.1                  | 1.1                  | 0.0                 |
| Bases (unweighted)                                  | 250                              | 250                            | 250                             | 250           | 250                 | 250                  | 250                  | 250                 |
| % consumers                                         | 100                              | 100                            | 100                             | 27            | 94                  | 88                   | 20                   | 55                  |

NDNS: UK National Diet and Nutrition Survey. <sup>1</sup>Added sugars (European Food Safety Authority, EFSA): Sugar—table + Sugar—other; <sup>2</sup>Free sugars (World Health Organisation, WHO): Added sugars (EFSA) + Sugar—honey + Sugar—fruit juice; <sup>3</sup>Free sugars (UK Scientific Advisory Committee on Nutrition, SACN): Free sugars (WHO) + Sugar—pureed fruit. <sup>4</sup>Discretionary sugars added to foods and drinks, apart from tea and coffee; <sup>5</sup>Other milks include milkshake, coffee whitener, milk drinks, hot chocolate, milk alternatives, dried milk and milks other than cows' milk. <sup>6</sup>Soft drinks include squashes, cordials, tonic water, energy drinks, all types of still and carbonated soft drinks and ice tea. <sup>7</sup>Diet refers to low-calorie, no-added-sugar (EFSA) and sugar-free varieties. <sup>8</sup>Beverages dry weight includes instant and powder forms of drinking chocolate, cocoa, malted drinks,

milk shake powder, tea and coffee such as cappuccino, latte and mocha with sugar. \*Some food groups such as meats are removed as they don't have relevance to this table. Therefore, the sum of % contributions may not always add up to % consumers.

**Table S6.** Contribution (%) of NDNS RP food group sources to intake of sugars by age (65+ Years) (NDNS 2014-2016)\*

| Adults, 65+ Years (N=335)                           |                                  |                                |                                 |               |                     |                      |                      |                     |
|-----------------------------------------------------|----------------------------------|--------------------------------|---------------------------------|---------------|---------------------|----------------------|----------------------|---------------------|
|                                                     | Added sugars (EFSA) <sup>1</sup> | Free sugars (WHO) <sup>2</sup> | Free sugars (SACN) <sup>3</sup> | Sugar - honey | Sugar - fruit juice | Sugar - pureed fruit | Sugar - stewed fruit | Sugar - dried fruit |
| Cereals and cereal products                         | 37.8                             | 32.0                           | 31.7                            | 8.2           | 2.4                 | 12.1                 | 22.3                 | 44.3                |
| - Breakfast cereals                                 | 5.2                              | 4.6                            | 4.4                             | 8.0           | 0.0                 | 0.1                  | 0.0                  | 14.0                |
| - Biscuits, buns, cakes, pastries, fruit pies       | 28.0                             | 23.6                           | 23.6                            | 0.1           | 2.2                 | 11.8                 | 21.9                 | 29.5                |
| - Pasta, rice, bread and other cereals              | 4.6                              | 3.8                            | 3.7                             | 0.1           | 0.2                 | 0.3                  | 0.4                  | 0.8                 |
| Sugars, preserves, confectionery                    | 32.6                             | 30.0                           | 30.1                            | 13.7          | 4.8                 | 27.1                 | 0.1                  | 1.5                 |
| - Sugars <sup>4</sup> , preserves, sweet spreads    | 10.9                             | 11.1                           | 11.4                            | 13.7          | 4.0                 | 27.0                 | 0.1                  | 0.0                 |
| - Sugars consumed in tea and coffee                 | 13.7                             | 12.4                           | 12.3                            | 0.0           | 0.0                 | 0.0                  | 0.0                  | 0.0                 |
| - Sugar confectionery                               | 1.8                              | 1.4                            | 1.4                             | 0.0           | 0.8                 | 0.1                  | 0.0                  | 0.3                 |
| - Chocolate confectionery                           | 6.2                              | 5.0                            | 5.0                             | 0.0           | 0.0                 | 0.0                  | 0.0                  | 1.2                 |
| Milk and milk products                              | 11.2                             | 9.7                            | 9.6                             | 2.1           | 0.9                 | 20.6                 | 4.8                  | 0.0                 |
| - Yogurt, fromage frais, dairy desserts             | 5.5                              | 4.9                            | 5.0                             | 1.8           | 0.5                 | 16.9                 | 4.6                  | 0.0                 |
| - Ice cream                                         | 4.7                              | 3.9                            | 3.8                             | 0.2           | 0.2                 | 3.7                  | 0.0                  | 0.0                 |
| - Cream and other milks <sup>5</sup>                | 0.9                              | 0.9                            | 0.8                             | 0.0           | 0.2                 | 0.0                  | 0.0                  | 0.0                 |
| Fruits and fruit products                           | 1.1                              | 0.9                            | 1.5                             | 0.0           | 0.8                 | 3.0                  | 16.9                 | 12.5                |
| Non-alcoholic beverages                             | 7.1                              | 13.1                           | 13.0                            | 0.0           | 35.8                | 3.1                  | 0.4                  | 0.0                 |
| - Fruit and vegetable juice                         | 0.3                              | 6.8                            | 6.7                             | 0.0           | 24.9                | 0.8                  | 0.0                  | 0.0                 |
| - Soft drinks <sup>6</sup> (not diet <sup>7</sup> ) | 6.7                              | 6.2                            | 6.0                             | 0.0           | 6.7                 | 0.0                  | 0.4                  | 0.0                 |
| - Soft drinks <sup>6</sup> (diet <sup>7</sup> )     | 0.0                              | 0.1                            | 0.2                             | 0.0           | 3.9                 | 2.3                  | 0.0                  | 0.0                 |
| Alcoholic beverages                                 | 0.2                              | 5.6                            | 5.5                             | 0.0           | 32.0                | 0.7                  | 0.0                  | 0.0                 |
| Miscellaneous                                       | 5.1                              | 4.3                            | 4.3                             | 2.9           | 5.0                 | 5.3                  | 1.7                  | 0.3                 |
| - Beverages dry weight <sup>8</sup>                 | 2.5                              | 2.1                            | 2.1                             | 0.0           | 0.0                 | 0.0                  | 0.0                  | 0.0                 |
| - Soups                                             | 0.8                              | 0.6                            | 0.6                             | 0.0           | 0.1                 | 0.0                  | 0.3                  | 0.0                 |
| - Savoury sauces and condiments                     | 1.6                              | 1.4                            | 1.4                             | 2.9           | 4.8                 | 5.3                  | 1.5                  | 0.3                 |
| Bases (unweighted)                                  | 335                              | 335                            | 335                             | 335           | 335                 | 335                  | 335                  | 335                 |
| % consumers                                         | 100                              | 100                            | 100                             | 29            | 87                  | 72                   | 48                   | 60                  |

NDNS: UK National Diet and Nutrition Survey. <sup>1</sup>Added sugars (European Food Safety Authority, EFSA): Sugar—table + Sugar—other; <sup>2</sup>Free sugars (World Health Organisation, WHO): Added sugars (EFSA) + Sugar—

honey + Sugar—fruit juice; <sup>3</sup>Free sugars (UK Scientific Advisory Committee on Nutrition, SACN): Free sugars (WHO) + Sugar—pureed fruit. <sup>4</sup>Discretionary sugars added to foods and drinks, apart from tea and coffee; <sup>5</sup>Other milks include milkshake, coffee whitener, milk drinks, hot chocolate, milk alternatives, dried milk and milks other than cows' milk. <sup>6</sup>Soft drinks include squashes, cordials, tonic water, energy drinks, all types of still and carbonated soft drinks and ice tea. <sup>7</sup>Diet refers to low-calorie, no-added-sugar (EFSA) and sugar-free varieties. <sup>8</sup>Beverages dry weight includes instant and powder forms of drinking chocolate, cocoa, malted drinks, milk shake powder, tea and coffee such as cappuccino, latte and mocha with sugar. \*Some food groups such as meats are removed as they don't have relevance to this table. Therefore, the sum of % contributions may not always add up to % consumers.
